# Supplementary material
Source: PubMed Central journal article supplement (PMC6217719)
Supplement: jiy454_suppl_supplementary_material.pdf [file jiy454_suppl_supplementary_material.pdf]

# Supplementary Materials

Fig S1. Study design

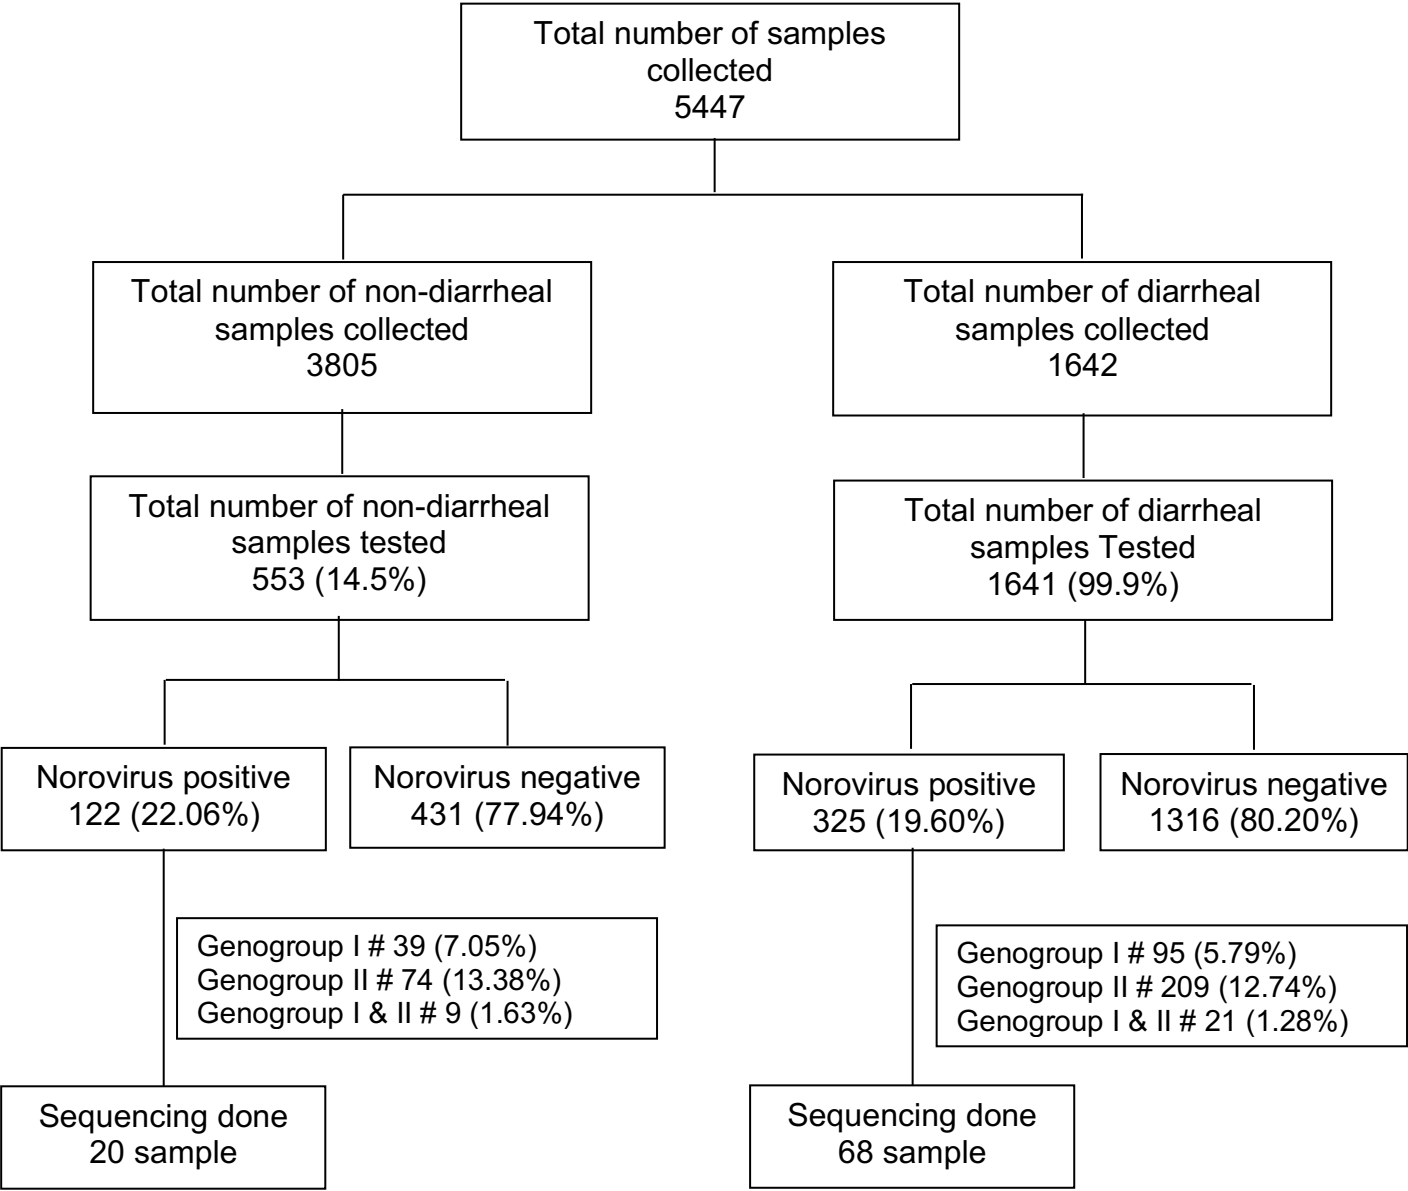

**Fig. S2. Proportion of children testing positive for norovirus, by age.** The proportion of children ages 0-24 months in the Bangladesh cohort with a PCR-positive norovirus test (blue = GI, red = GII), by age (month).

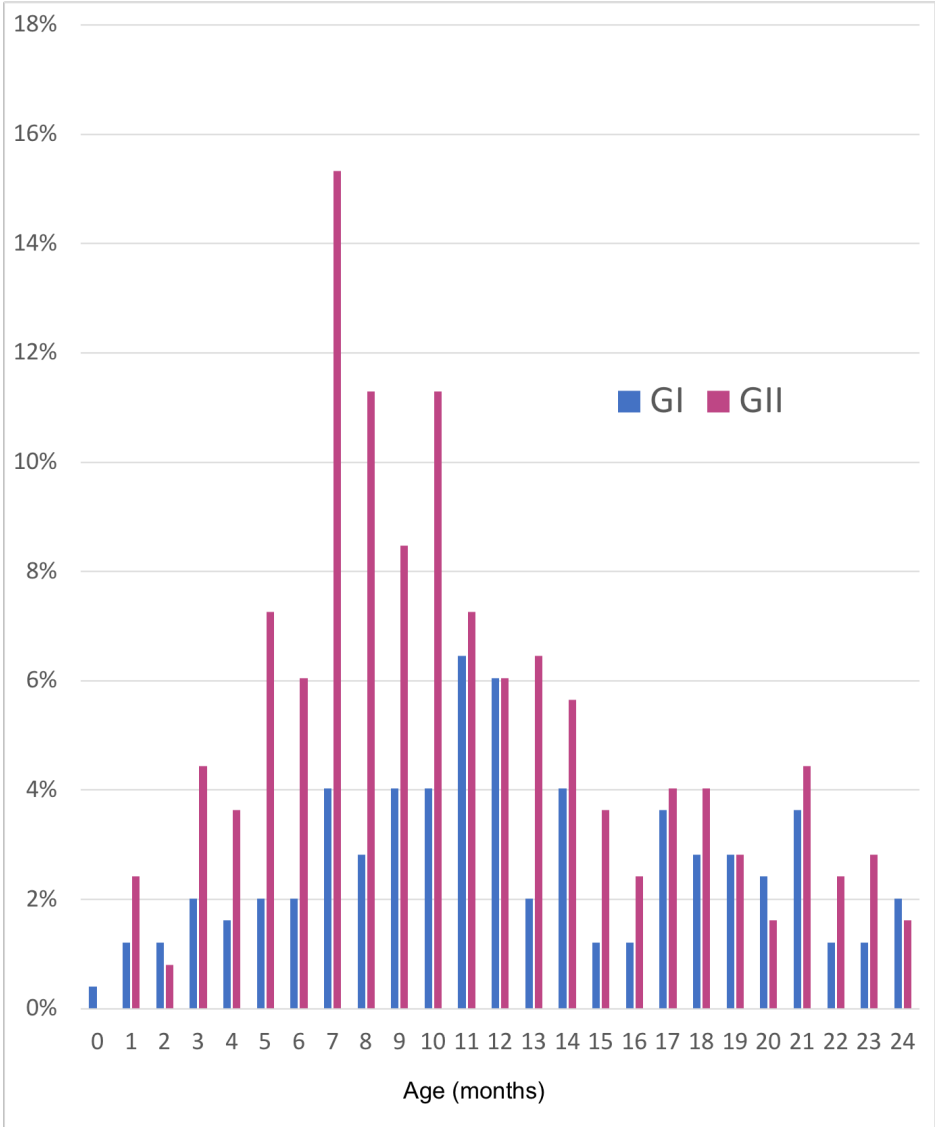

**Fig. S3. GII tree (VP1 gene).** Similar tree as presented in Fig. 1A, with tip labels. Shading and labels are similar to Fig. 1A. Viruses from Bangladesh have names beginning with 'BG' and are highlighted in bold font. The eighteen GII genotypes identified in the Dhaka birth cohort are labeled 'BG'.

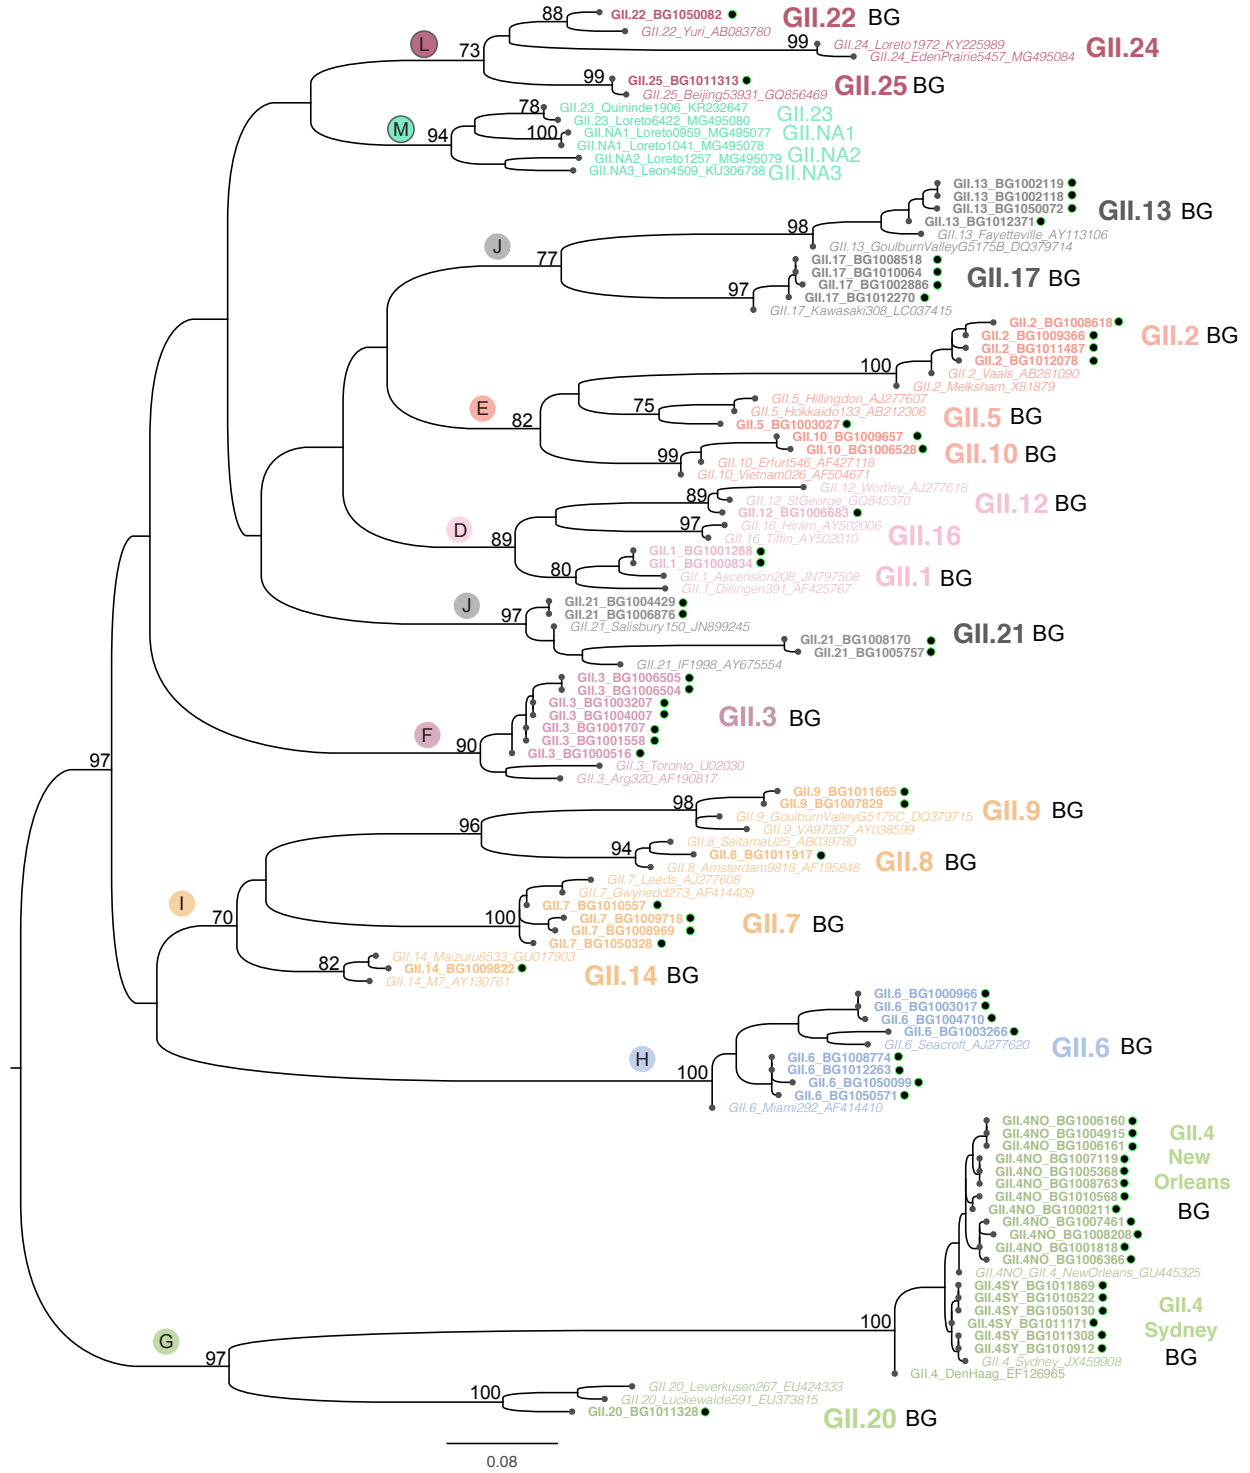

**Fig. S4. Phylogenetic relationships of monthly and diarrheal stools.** ML tree of VP1 GII viruses from Bangladesh only. Each tip is shaded by a red diamond (monthly non-diarrheal stool) or black square (diarrheal stool, similar to symbols used in Fig. 2) to show the lack of clustering of cases by collection type. Genotypes are shaded similar to Fig. 1B.

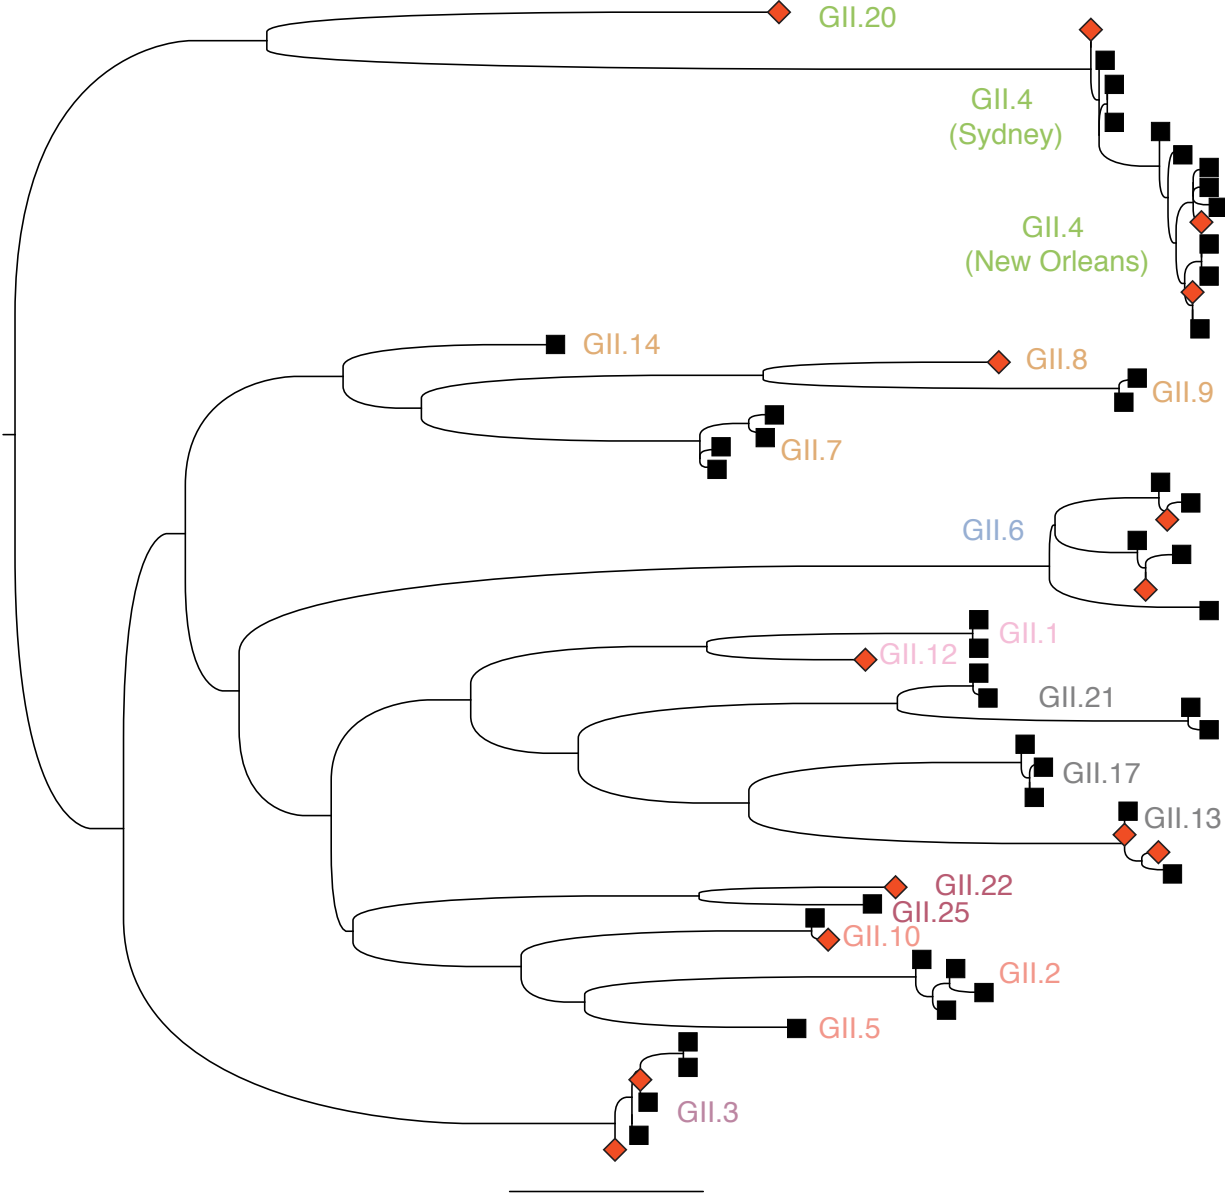

**Fig. S5. GI tree (RdRp gene).** Evolutionary relationships between noroviruses (RdRp gene, GI genogroup) collected from children in Dhaka, Bangladesh, with reference sequences representing genotypes observed globally included as background. Viruses from Bangladesh have names beginning with 'BG' and are highlighted in bold font and indicated with a green circle.

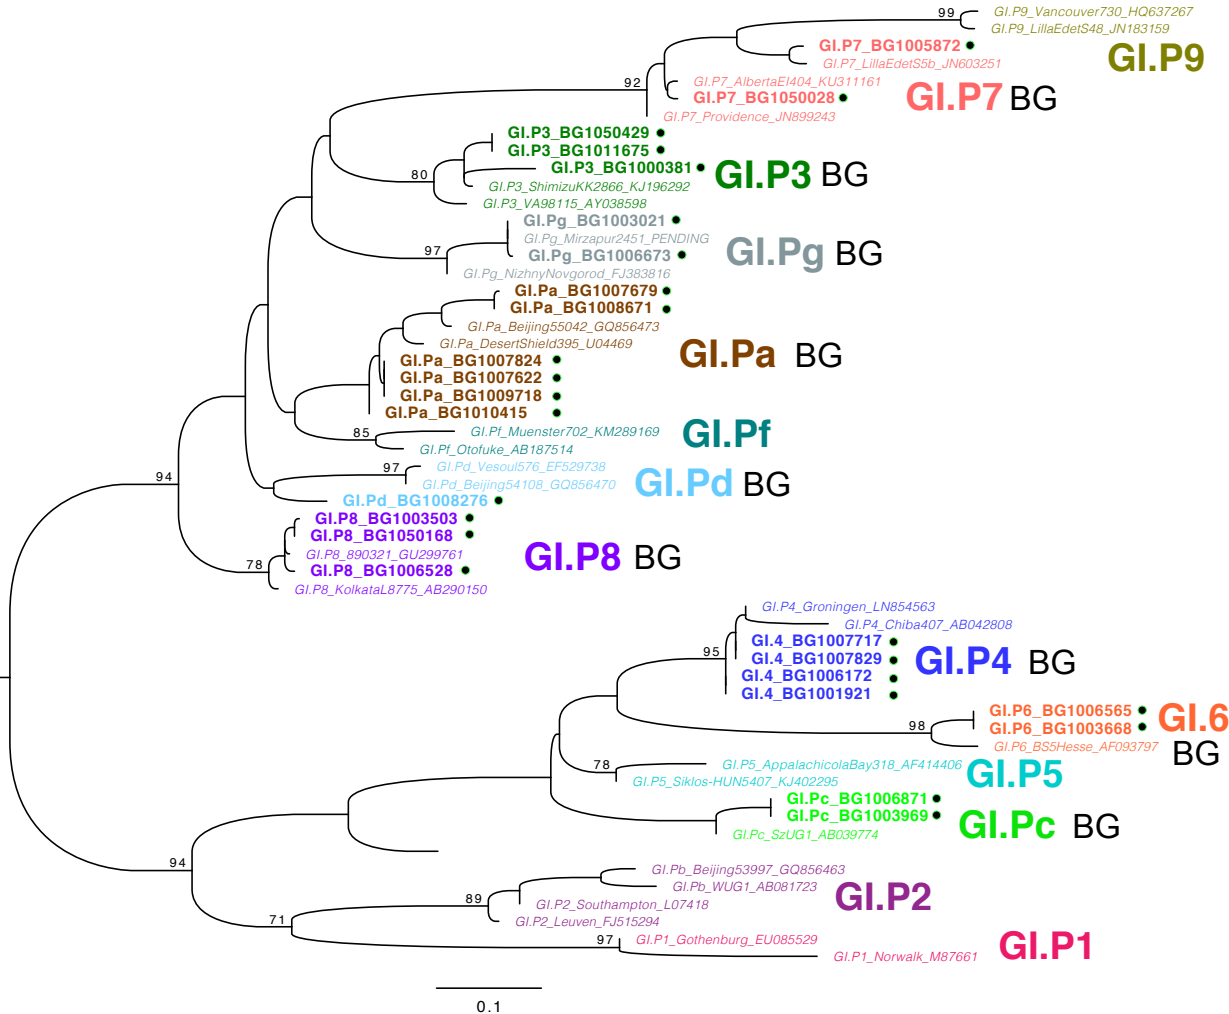

**Fig. S6. GII tree (RdRp gene).** Evolutionary relationships between noroviruses (RdRp gene, GII genogroup) collected from children in Dhaka, Bangladesh, with reference sequences representing genotypes observed globally included as background. Viruses from Bangladesh have names beginning with 'BG' and are highlighted in bold font and indicated with a green circle.

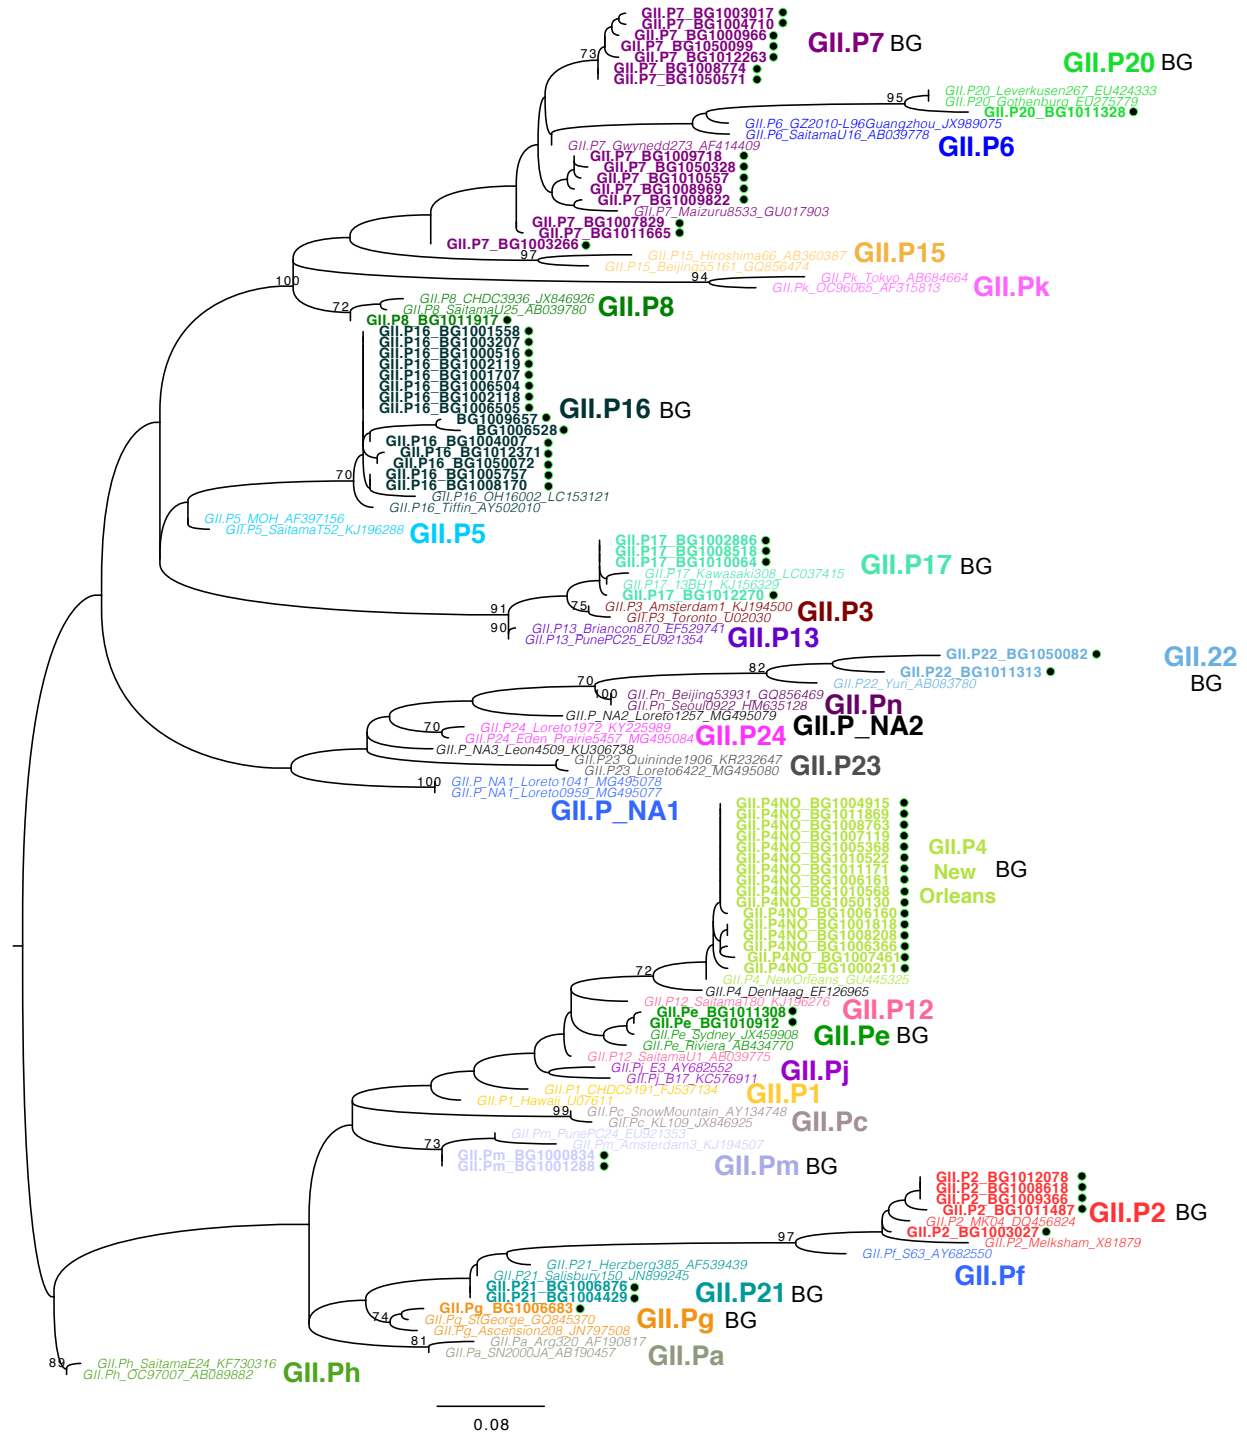

**Fig. S7. Samples testing positive for norovirus within re-infected children.** Each circle represents a diarrheal sample collected from a child in the cohort that was tested for norovirus. Each triangle represents a non-diarrheal sample that was obtained during routine monthly collections. Circles and triangles are shaded by the PCR test result: grey = negative for norovirus; blue = positive for GI; red = positive for GII; purple = positive for GI and GII. Each row represents the samples obtained from an individual child in the cohort. The y-axis is ordered by children with the lowest number of norovirus-positive samples identified during the first two years of life (0 positive samples, bottom) to the highest (10, top). The x-axis indicates the child's age at which the sample was collected (0-24 months). The total number of positive noroviruses detected in all children of a given age (month) is indicated by the black-and-white heat-map provided on the x-axis.

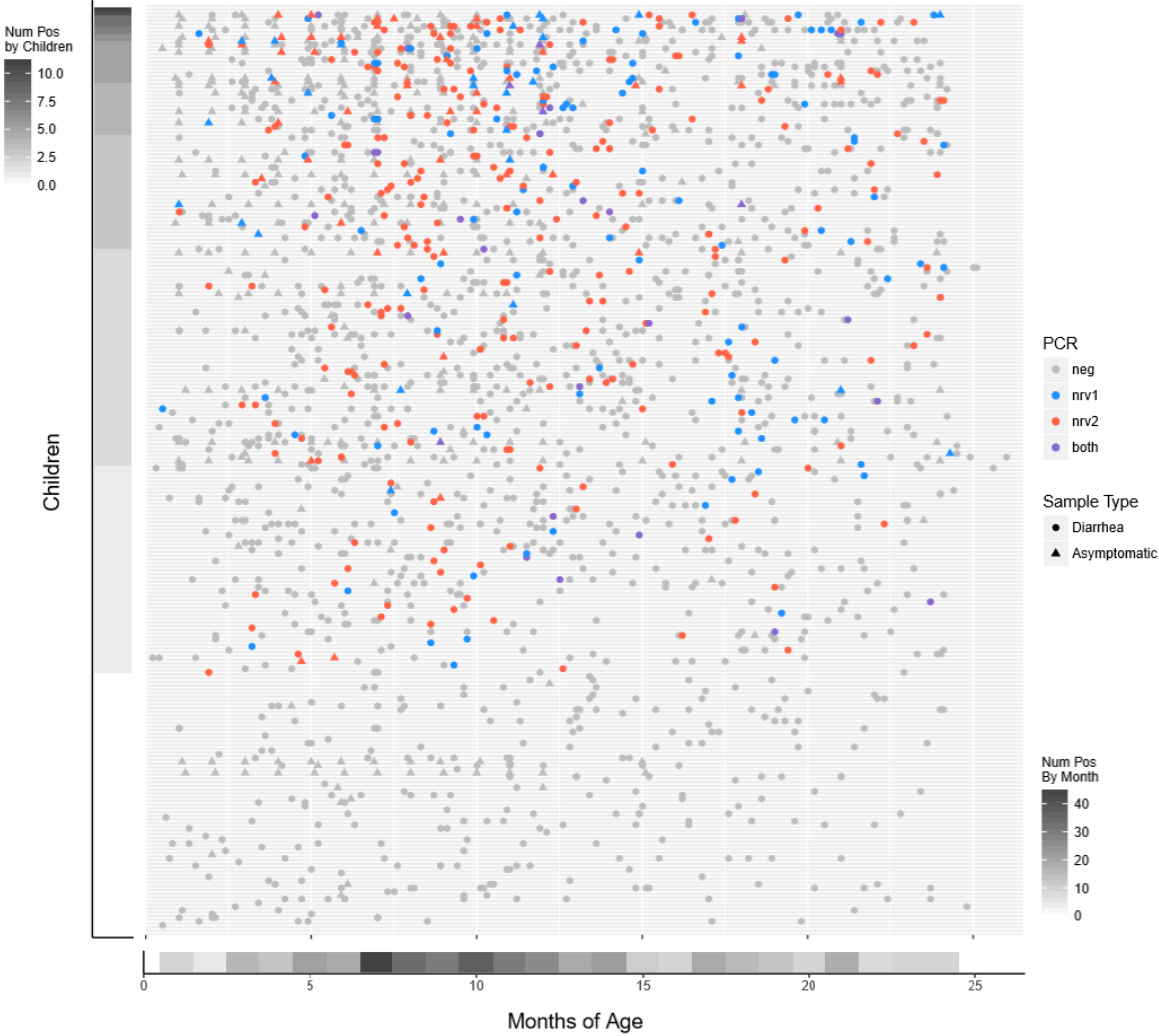



**Table S1: Burden of norovirus infection in MAL-ED children of Bangladesh**

|                                                                 | Diarrheal | Non-diarrheal |
|-----------------------------------------------------------------|-----------|---------------|
| Total number of children                                        | 265       | 49            |
| Total number of infected children                               | 162       | 27            |
| Total number of re-infected children                            | 86        | 19            |
| Child-months contributed                                        | 5584      | 324           |
| Total episodes <sup>#</sup> with a norovirus sample associated  | 307       | 72            |
| Total episodes with a GI sample associated                      | 110       | 30            |
| Total episodes with a GII sample associated                     | 214       | 47            |
| Total episodes with a GI and GII sample associated              | 17        | 5             |
| Incidence rate of norovirus (per 100 child-months)              | 5.49      | 22.22         |
| Incidence rate of norovirus genogroup I (per 100 child-months)  | 1.97      | 9.26          |
| Incidence rate of norovirus genogroup II (per 100 child-months) | 3.83      | 14.51         |

<sup>#</sup> All detections, whether asymptomatic or diarrheal, were considered episodes for the calculation of incidence rates.

**Table S2. Study population characteristics**

| <b>Indicator</b>                                  | <b>Selected children for sequencing<br/>N=70</b> | <b>All norovirus positive children<br/>N=179</b> | <b>All children<br/>N=248</b> |
|---------------------------------------------------|--------------------------------------------------|--------------------------------------------------|-------------------------------|
| Male sex, n (%)                                   | 30 (42.86)                                       | 84 (46.93)                                       | 122 (49.19)                   |
| Low birth weight, n (%)                           | 13 (18.57)                                       | 43 (24.02)                                       | 54 (21.77)                    |
| Weight for age z score at birth, mean $\pm$ SD    | -1.23 $\pm$ 0.87                                 | -1.34 $\pm$ 0.92                                 | -1.30 $\pm$ 0.91              |
| Length for age z score at birth, mean $\pm$ SD    | -1.00 $\pm$ 1.00                                 | -1.08 $\pm$ 0.99                                 | -1.06 $\pm$ 1.01              |
| Weight for length z score at birth, mean $\pm$ SD | -0.92 $\pm$ 0.87                                 | -1.04 $\pm$ 1.06                                 | -0.99 $\pm$ 1.07              |
| Duration of EBF in days, median (IQR)             | 95.5 (38, 150)                                   | 96 (53, 150)                                     | 98.5 (57, 150)                |
| Mother's age in years, median (IQR)               | 23 (20, 27)                                      | 25 (20, 27)                                      | 25 (21, 28)                   |
| Mother's education in years, median (IQR)         | 5 (2, 7)                                         | 5 (2, 7)                                         | 5 (2, 7)                      |
| Mother's BMI, mean $\pm$ SD                       | 22.43 $\pm$ 3.31                                 | 22.13 $\pm$ 3.25                                 | 22.33 $\pm$ 3.43              |
| WAMI score, mean $\pm$ SD                         | 0.56 $\pm$ 0.10                                  | 0.55 $\pm$ 0.12                                  | 0.55 $\pm$ 0.12               |
| <b>Household food insecurity access category:</b> |                                                  |                                                  |                               |
| Food secure                                       | 50 (71.43)                                       | 133 (74.30)                                      | 187 (75.40)                   |
| Mildly food insecure                              | 7 (10.00)                                        | 12 (6.70)                                        | 14 (5.65)                     |
| Moderately food insecure                          | 6 (8.57)                                         | 19 (10.61)                                       | 29 (11.69)                    |
| Severely food insecure                            | 7 (10.00)                                        | 15 (8.38)                                        | 18 (7.26)                     |
| <b>Wash hands after helping child defecate:</b>   |                                                  |                                                  |                               |
| Never                                             | 5 (7.14)                                         | 11 (6.21)                                        | 16 (6.69)                     |
| Rarely                                            | 6 (8.57)                                         | 15 (8.47)                                        | 16 (6.69)                     |
| Sometime                                          | 8 (11.43)                                        | 24 (13.56)                                       | 33 (13.81)                    |
| Always                                            | 51 (72.86)                                       | 127 (71.75)                                      | 174 (72.80)                   |
| <b>Wash hands before preparing food:</b>          |                                                  |                                                  |                               |
| Never                                             | 33 (47.14)                                       | 89 (50.28)                                       | 118 (49.37)                   |
| Rarely                                            | 3 (7.14)                                         | 19 (10.73)                                       | 26 (10.88)                    |
| Sometime                                          | 14 (20.00)                                       | 30 (16.95)                                       | 42 (17.57)                    |
| Always                                            | 18 (24.71)                                       | 39 (22.03)                                       | 53 (22.18)                    |
| <b>Wash hands after using the toilet:</b>         |                                                  |                                                  |                               |
| Never                                             | 3 (4.29)                                         | 8 (4.52)                                         | 9 (3.77)                      |
| Rarely                                            | 6 (8.57)                                         | 17 (9.60)                                        | 18 (7.53)                     |
| Sometime                                          | 9 (12.86)                                        | 27 (15.25)                                       | 31 (12.97)                    |
| Always                                            | 52 (74.29)                                       | 125 (70.62)                                      | 181 (75.73)                   |

**Table S3. Summary of norovirus genotypes identified in the Dhaka birth cohort**

| GI                  |                     | GII                 |                     |
|---------------------|---------------------|---------------------|---------------------|
| VP1                 | RdRp                | VP1                 | RdRp                |
| <i>BG</i>           | <i>BG</i>           | <i>BG</i>           | <i>BG</i>           |
| <b>GI.3</b>         | <b>GI.P3</b>        | <b>GII.1</b>        | <b>GII.P2</b>       |
| <b>GI.4</b>         | <b>GI.P4</b>        | <b>GII.2</b>        | <b>GII.P4</b>       |
| <b>GI.5</b>         | <b>GI.6</b>         | <b>GII.3</b>        | <b>GII.P7</b>       |
| <b>GI.6</b>         | <b>GI.P7</b>        | <b>GII.4</b>        | <b>GII.P16</b>      |
| <b>GI.7</b>         | <b>GI.P8</b>        | <b>GII.5</b>        | <b>GII.P17</b>      |
| <b>GI.8</b>         | <b>GI.Pa</b>        | <b>GII.6</b>        | <b>GII.P20</b>      |
|                     | <b>GI.Pc</b>        | <b>GII.7</b>        | <b>GII.P21</b>      |
|                     | <b>GI.Pd</b>        | <b>GII.8</b>        | <b>GII.22</b>       |
| <i>Not detected</i> | <b>GI.Pg</b>        | <b>GII.9</b>        | <b>GII.Pe</b>       |
| <b>GI.1</b>         |                     | <b>GII.10</b>       | <b>GII.Pg</b>       |
| <b>GI.2</b>         | <i>Not detected</i> | <b>GI.12</b>        | <b>GII.Pm</b>       |
| <b>GI.9</b>         | <b>GI.P1</b>        | <b>GII.13</b>       | <i>Not detected</i> |
|                     | <b>GI.P2</b>        | <b>GII.14</b>       | <b>GII.P1</b>       |
|                     | <b>GI.P5</b>        | <b>GII.17</b>       | <b>GII.P3</b>       |
|                     | <b>GI.P9</b>        | <b>GII.20</b>       | <b>GII.P5</b>       |
|                     | <b>GI.Pf</b>        | <b>GII.21</b>       | <b>GII.P6</b>       |
|                     |                     | <b>GII.22</b>       | <b>GII.P8</b>       |
|                     |                     | <b>GII.25</b>       | <b>GII.P12</b>      |
|                     |                     | <i>Not detected</i> | <b>GII.P13</b>      |
|                     |                     | <i>Not detected</i> | <b>GII.P15</b>      |
|                     |                     | <i>Not detected</i> | <b>GII.P23</b>      |
|                     |                     | <b>GII.16</b>       | <b>GII.P24</b>      |
|                     |                     | <b>GII.23</b>       | <b>GII.Pa</b>       |
|                     |                     | <b>GII.24</b>       | <b>GII.Pc</b>       |
|                     |                     |                     | <b>GII.Pf</b>       |
|                     |                     |                     | <b>GII.Ph</b>       |
|                     |                     |                     | <b>GII.Pk</b>       |
|                     |                     |                     | <b>GII.Pj</b>       |
|                     |                     |                     | <b>GII.Pn</b>       |

**Table S4. Summary of recombinant noroviruses**

|     | Polymerase | Capsid | Virus identifier(s)                                                                   |
|-----|------------|--------|---------------------------------------------------------------------------------------|
| GI  | GI.Pa      | GI.3   | BG1007679 BG1008671                                                                   |
|     | GI.Pa      | GI.3   | BG1010415 BG1007622 BG1007824<br>BG1009718 BG1000381                                  |
|     | GI.Pc      | GI.5   | BG1003969 BG1006871                                                                   |
|     | GI.Pg      | GI.7   | BG1003021 BG1006673                                                                   |
|     | GI.Pd      | GI.3   | BG1008276                                                                             |
| GII | GII.P2     | GII.5  | BG1003027                                                                             |
|     | GII.P7     | GII.6  | BG1003266 BG1050099 BG1012263<br>BG1008774 BG1050571 BG1000966<br>BG1003017 BG1004710 |
|     | GII.P7     | GII.9  | BG1007829 BG1011665                                                                   |
|     | GII.P7     | GII.14 | BG1009822                                                                             |
|     | GII.P16    | GII.10 | BG1006528 BG1009657                                                                   |
|     | GII.P16    | GII.3  | BG1006504 BG1006505 BG1000516<br>BG1001558 BG1004007 BG1001707<br>BG1003207           |
|     | GII.P16    | GII.21 | BG1005757 BG1008170                                                                   |
|     | GII.P16    | GII.13 | BG1012371 BG1002118 BG1002119<br>BG1050072                                            |
|     | GII.22     | GII.25 | BG1011313                                                                             |
|     | GII.Pe     | GII.4  | BG1010912 BG1011308                                                                   |
|     | GII.Pg     | GII.12 | BG1006683                                                                             |
|     | GII.Pm     | GII.1  | BG1000834 BG1001288                                                                   |

**Table S5. Characteristics of norovirus samples sequenced for this study.** Each sample is described as either M (routine monthly non-diarrheal stool collection) or D (diarrheal stool collection). The age (days) and sex is provided, along with the collection date and the genotyping results.

| Monthly/<br>Diarrheal | Collection<br>date | Age (d) | Sex | RdRp          | VP1         |
|-----------------------|--------------------|---------|-----|---------------|-------------|
| M                     | 13-Nov-10          | 59      | F   | GI.P8         | GI.8        |
| M                     | 13-Dec-10          | 273     | F   | GII.P16       | GII.3       |
| M                     | 18-Dec-10          | 121     | M   | GII.P16       | GII.3       |
| M                     | 7-Mar-11           | 57      | M   | GII.P16       | GII.3       |
| M                     | 28-Mar-11          | 271     | M   | GII.P16       | GII.13      |
| M                     | 7-Apr-11           | 241     | F   | GII.P7        | GII.6       |
| M                     | 7-Jun-11           | 302     | F   | GI.Pg         | GI.7        |
| M                     | 26-Aug-11          | 179     | M   | GII.P4NO      | GII.4NO     |
| M                     | 31-Oct-11          | 335     | F   | GII.P4NO      | GII.4NO     |
| M                     | 2-Nov-11           | 450     | F   | GII.P2        | GII.5       |
| M                     | 7-Jan-12           | 363     | M   | GI.P8/GII.P16 | GI.8/GII.10 |
| M                     | 26-Jan-12          | 124     | F   | GII.Pe        | GII.4SY     |
| M                     | 2-Jun-12           | 150     | F   | GI.P8         | GI.8        |
| M                     | 17-Jul-12          | 212     | F   | GII.P7        | GII.6       |
| M                     | 22-Jul-12          | 547     | M   | GII.Pg        | GII.12      |
| M                     | 1-Aug-12           | 213     | M   | GII.P16       | GII.13      |
| M                     | 22-Sep-12          | 364     | F   | GII.P20       | GII.20      |
| M                     | 31-Oct-12          | 304     | M   | GII.P22       | GII.22      |
| M                     | 25-Nov-12          | 373     | F   | GII.P8        | GII.8       |
| M                     | 19-Dec-12          | 334     | F   | GI.P3         | GI.3        |
| D                     | 21-Aug-10          | 181     | F   | GII.P4NO      | GII.4NO     |
| D                     | 29-Sep-10          | 142     | M   | GII.P16       | GII.3       |
| D                     | 6-Oct-10           | 140     | F   | GII.P16       | GII.3       |
| D                     | 27-Oct-10          | 212     | F   | GII.P7        | GII.6       |
| D                     | 1-Jan-11           | 100     | F   | GII.P16       | GII.3       |
| D                     | 28-Feb-11          | 243     | M   | GII.P16       | GII.13      |
| D                     | 9-Mar-11           | 59      | M   | GII.P16       | GII.3       |
| D                     | 15-Mar-11          | 295     | M   | GII.P4NO      | GII.4NO     |
| D                     | 24-Mar-11          | 101     | F   | GII.P16       | GII.21      |
| D                     | 7-May-11           | 188     | F   | GII.P7        | GII.6       |
| D                     | 9-May-11           | 258     | F   | GII.P7        | GII.6       |
| D                     | 14-May-11          | 338     | M   | GI.P4         | GI.4        |
| D                     | 9-Jul-11           | 294     | F   | GI.P6         | GI.6        |
| D                     | 13-Jul-11          | 204     | F   | GII.P4NO      | GII.4NO     |

|   |           |     |   |              |            |
|---|-----------|-----|---|--------------|------------|
| D | 19-Jul-11 | 210 | F | GII.P4NO     | GII.4NO    |
| D | 19-Jul-11 | 187 | M | GI.P6        | GI.6       |
| D | 27-Jul-11 | 270 | M | GII.P4NO     | GII.4NO    |
| D | 6-Aug-11  | 304 | F | GI.Pc        | GI.5       |
| D | 7-Aug-11  | 220 | F | GII.P4NO     | GII.4NO    |
| D | 11-Aug-11 | 529 | F | GI.P3        | GI.3       |
| D | 19-Sep-11 | 171 | F | GII.P4NO     | GII.4NO    |
| D | 22-Sep-11 | 99  | F | GII.P16      | GII.10     |
| D | 3-Nov-11  | 274 | F | GII.P4NO     | GII.4NO    |
| D | 16-Nov-11 | 289 | F | GI.Pc        | GI.5       |
| D | 19-Nov-11 | 341 | M | GI.P7        | GI.7       |
| D | 27-Nov-11 | 217 | F | GII.P4NO     | GII.4NO    |
| D | 7-Dec-11  | 106 | M | GII.P7       | GII.7      |
| D | 12-Dec-11 | 277 | M | GI.P4        | GI.4       |
| D | 26-Dec-11 | 267 | M | GII.P16      | GII.21     |
| D | 29-Dec-11 | 373 | F | GI.P4        | GI.4       |
| D | 19-Jan-12 | 234 | F | GII.P2       | GII.2      |
| D | 21-Jan-12 | 280 | M | GII.P2       | GII.2      |
| D | 5-Feb-12  | 267 | M | GII.P7       | GII.7      |
| D | 7-Feb-12  | 664 | M | GII.Pm       | GII.1      |
| D | 7-Feb-12  | 331 | F | GI.Pa        | GI.3       |
| D | 11-Feb-12 | 376 | F | GII.P21      | GII.21     |
| D | 13-Feb-12 | 239 | F | GI.Pa/GII.P7 | GI.3/GII.7 |
| D | 19-Feb-12 | 341 | F | GI.Pa        | GI.3       |
| D | 28-Feb-12 | 402 | M | GI.Pg        | GI.7       |
| D | 3-Mar-12  | 330 | F | GII.P17      | GII.17     |
| D | 4-Mar-12  | 231 | F | GII.P17      | GII.17     |
| D | 13-Mar-12 | 719 | M | GII.Pm       | GII.1      |
| D | 19-Mar-12 | 591 | M | GII.P17      | GII.17     |
| D | 3-Apr-12  | 192 | F | GII.P25      | GII.25     |
| D | 9-Apr-12  | 371 | M | GI.Pd        | GI.3       |
| D | 12-Apr-12 | 549 | M | GII.P21      | GII.21     |
| D | 19-Apr-12 | 226 | F | GII.Pe       | GII.4SY    |
| D | 22-Apr-12 | 252 | M | GI.Pa        | GI.3       |
| D | 25-Apr-12 | 374 | M | GI.Pa        | GI.3       |
| D | 29-Apr-12 | 250 | M | GII.P4NO     | GII.4NO    |
| D | 6-May-12  | 418 | M | GI.Pa        | GI.3       |
| D | 13-May-12 | 425 | F | GI.P4/GII.P7 | GI.4/GII.9 |
| D | 1-Jul-12  | 252 | F | GII.P7       | GII.9      |
| D | 4-Jul-12  | 437 | F | GII.P7       | GII.6      |

|   |           |     |   |          |         |
|---|-----------|-----|---|----------|---------|
| D | 18-Aug-12 | 415 | F | GII.P7   | GII.14  |
| D | 4-Sep-12  | 302 | F | GII.P4NO | GII.4SY |
| D | 4-Sep-12  | 213 | M | GII.P7   | GII.6   |
| D | 2-Oct-12  | 275 | M | GII.4NO  | GII.4SY |
| D | 15-Oct-12 | 421 | M | GII.P4NO | GII.4SY |
| D | 21-Oct-12 | 397 | F | GII.P4NO | GII.4SY |
| D | 7-Nov-12  | 325 | F | GII.P17  | GII.17  |
| D | 26-Dec-12 | 370 | M | GII.P16  | GII.13  |
| D | 21-Jan-13 | 456 | F | GI.P3    | GI.3    |
| D | 26-Jan-13 | 417 | F | GII.P2   | GII.2   |
| D | 12-Feb-13 | 403 | F | GII.P7   | GII.7   |
| D | 24-Mar-13 | 453 | F | GI.P7    | GI.7    |
| D | 7-Apr-13  | 543 | M | GII.P2   | GII.2   |
| D | 16-Apr-13 | 471 | M | GII.P7   | GII.6   |
